# Supplementary material for: High- or Low-Yielding F2 Progeny of Wheat Is Result of Specific TaCKX Gene Coexpression Patterns in Association with Grain Yield in Paternal Parent
Source: MDPI journal article supplement (doi:10.3390/ijms25063553), 2024-03-21
Supplement: s1 [file s1]

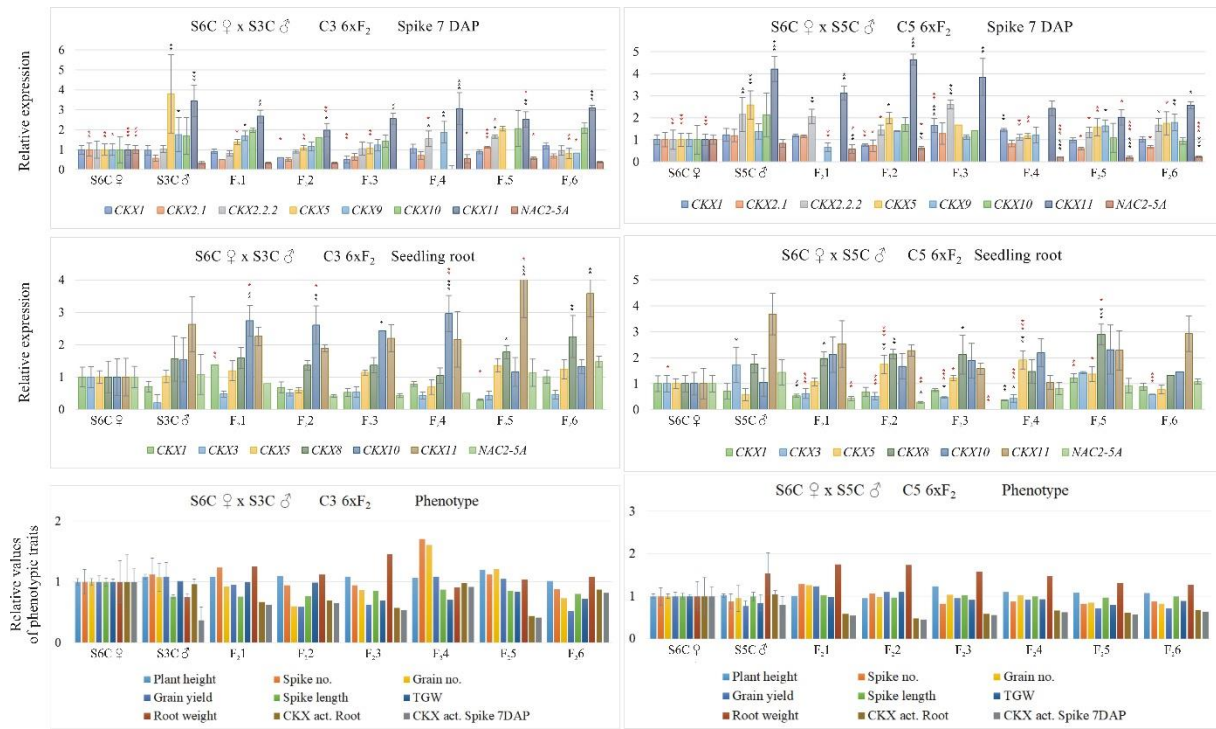

**Figure S1.** *TaCKX* GFM and *NAC2* expression patterns in 7 DAP spikes, seedling roots, and phenotypic traits in mother, pater, and their six F<sub>2</sub> progeny, from crosses of S6C x S3C (C3), S6C x S12B (C4\*) and S6C x S5C (C5). \* The data for the C4 cross have already been presented in Szala et al. [24], where S16C was a component of the reciprocal cross.

**Table S1.** Measurement data of phenotypic traits presented in Figure 1, 2 and S1, in which data were related to mother set as 1.00.

|    |                  | Plant height [cm]   |                | Spike no.           |                | Semi-empty spikes   |                | Grain no.           |                | Grain yield [g]     |                | Spike length [cm]   |                | TGW                 |                | Root weight [mg]    |                | CKX act. Spike 7DAP |                | CKX act. Root       |                |
|----|------------------|---------------------|----------------|---------------------|----------------|---------------------|----------------|---------------------|----------------|---------------------|----------------|---------------------|----------------|---------------------|----------------|---------------------|----------------|---------------------|----------------|---------------------|----------------|
|    |                  | Average for parents | OD for parents |
| C1 | S12B ♀           | 75.0                | 5.0            | 7.3                 | 0.6            | 0.018               | 0.016          | 248.3               | 41.0           | 11.8                | 1.0            | 10.0                | 0.2            | 47.9                | 4.3            | 40.7                | 18.3           | 0.575               | 0.052          | 1.062               | 0.592          |
|    | S6C ♂            | 71.0                | 3.6            | 5.7                 | 1.2            | 0.000               | 0.000          | 173.0               | 9.2            | 8.8                 | 0.8            | 9.6                 | 0.6            | 50.5                | 2.2            | 48.7                | 16.9           | 1.057               | 0.214          | 1.123               | 0.440          |
|    | F <sub>2</sub> 1 | 75.0                |                | 6.0                 |                | 0.014               |                | 202.0               |                | 10.3                |                | 10.7                |                | 50.8                |                | 56.0                |                | 0.709               |                | 0.979               |                |
|    | F <sub>2</sub> 2 | 70.0                |                | 6.0                 |                | 0.027               |                | 182.0               |                | 8.5                 |                | 10.2                |                | 46.8                |                | 66.0                |                | 0.961               |                | 0.746               |                |
|    | F <sub>2</sub> 3 | 78.0                |                | 6.0                 |                | 0.027               |                | 129.0               |                | 6.3                 |                | 9.5                 |                | 48.6                |                | 59.0                |                | 1.292               |                | 1.145               |                |
|    | F <sub>2</sub> 4 | 52.0                |                | 1.0                 |                | 0.014               |                | 2.0                 |                | 0.1                 |                | 4.0                 |                | 50.0                |                | 67.0                |                | 0.197               |                | 0.681               |                |
|    | F <sub>2</sub> 5 | 77.0                |                | 7.0                 |                | 0.000               |                | 283.0               |                | 13.8                |                | 10.6                |                | 48.8                |                | 15.0                |                | 0.962               |                | 0.594               |                |
|    | F <sub>2</sub> 6 | 76.0                |                | 5.0                 |                | 0.000               |                | 199.0               |                | 9.0                 |                | 12.9                |                | 45.0                |                | 10.0                |                | 0.555               |                | 0.784               |                |
| C2 | S12B ♀           | 75.0                | 5.0            | 7.3                 | 0.6            | 0.018               | 0.016          | 248.3               | 41.0           | 11.8                | 1.0            | 10.0                | 0.2            | 47.9                | 4.3            | 40.7                | 18.3           | 0.575               | 0.052          | 1.062               | 0.592          |
|    | S5C ♂            | 72.3                | 2.5            | 5.0                 | 1.0            | 0.005               | 0.008          | 165.0               | 52.6           | 6.7                 | 1.1            | 9.5                 | 1.0            | 42.7                | 9.1            | 74.7                | 25.0           | 1.109               | 0.203          | 0.891               | 0.084          |
|    | F <sub>2</sub> 1 | 77.0                |                | 6.0                 |                | 0.027               |                | 225.0               |                | 10.0                |                | 11.2                |                | 44.4                |                | 18.0                |                | 0.835               |                | 0.693               |                |
|    | F <sub>2</sub> 2 | 81.0                |                | 7.0                 |                | 0.000               |                | 223.0               |                | 11.1                |                | 9.8                 |                | 49.6                |                | 79.0                |                | 1.234               |                | 1.098               |                |
|    | F <sub>2</sub> 3 | 78.0                |                | 7.0                 |                | 0.027               |                | 202.0               |                | 9.2                 |                | 8.6                 |                | 45.7                |                | 83.0                |                | 0.609               |                |                     |                |
|    | F <sub>2</sub> 4 | 86.0                |                | 6.0                 |                | 0.000               |                | 203.0               |                | 10.0                |                | 9.6                 |                | 49.1                |                | 90.0                |                | 1.157               |                | 0.800               |                |
|    | F <sub>2</sub> 5 | 81.0                |                | 3.0                 |                | 0.014               |                | 25.0                |                | 0.9                 |                | 7.5                 |                | 37.6                |                | 90.0                |                | 1.259               |                | 1.772               |                |
|    | F <sub>2</sub> 6 | 71.0                |                | 4.0                 |                | 0.000               |                | 102.0               |                | 5.0                 |                | 8.8                 |                | 49.2                |                | 106.0               |                | 0.460               |                | 1.482               |                |
| C3 | S6C ♀            | 71.0                | 3.6            | 5.7                 | 1.2            | 0.000               | 0.000          | 173.0               | 9.2            | 8.8                 | 0.8            | 9.6                 | 0.6            | 50.5                | 2.2            | 48.7                | 16.9           | 1.057               | 0.214          | 1.123               | 0.440          |
|    | S3C ♂            | 77.0                | 2.6            | 6.3                 | 1.5            | 0.014               | 0.014          | 185.7               | 39.9           | 9.5                 | 2.0            | 7.3                 | 0.3            | 51.1                | 0.1            | 36.3                | 2.5            | 1.013               | 0.221          | 0.416               | 0.006          |
|    | F <sub>2</sub> 1 | 68.0                |                | 7.0                 |                | 0.014               |                | 74.0                |                | 3.4                 |                | 5.0                 |                | 45.4                |                | 113.0               |                | 0.975               |                | 0.707               |                |
|    | F <sub>2</sub> 2 | 76.0                |                | 7.0                 |                | 0.000               |                | 233.0               |                | 11.7                |                | 8.5                 |                | 50.3                |                | 64.0                |                | 1.328               |                | 0.734               |                |
|    | F <sub>2</sub> 3 | 77.0                |                | 12.0                |                | 0.069               |                | 369.0               |                | 9.7                 |                | 8.8                 |                | 26.3                |                | 35.0                |                | 1.076               |                | 0.604               |                |
|    | F <sub>2</sub> 4 | 77.0                |                | 8.0                 |                | 0.000               |                | 239.0               |                | 9.5                 |                | 7.7                 |                | 39.8                |                | 54.0                |                | 1.531               |                | 1.034               |                |
|    | F <sub>2</sub> 5 | 66.0                |                | 3.0                 |                | 0.000               |                | 39.0                |                | 1.5                 |                | 6.0                 |                | 39.5                |                | 78.0                |                | 2.057               |                | 0.470               |                |
|    | F <sub>2</sub> 6 | 86.0                |                | 8.0                 |                | 0.000               |                | 271.0               |                | 13.0                |                | 8.0                 |                | 47.9                |                | 34.0                |                | 2.319               |                | 0.925               |                |

|    |                  |      |     |      |     |       |       |       |       |      |     |      |     |      |      |       |      |       |       |       |       |
|----|------------------|------|-----|------|-----|-------|-------|-------|-------|------|-----|------|-----|------|------|-------|------|-------|-------|-------|-------|
| C4 | S6C ♀            | 71.0 | 3.6 | 5.7  | 1.2 | 0.000 | 0.000 | 173.0 | 9.2   | 8.8  | 0.8 | 9.6  | 0.6 | 50.5 | 2.2  | 48.7  | 16.9 | 1.057 | 0.214 | 1.123 | 0.440 |
|    | S12B ♂           | 75.0 | 5.0 | 7.3  | 0.6 | 0.018 | 0.016 | 248.3 | 41.0  | 11.8 | 1.0 | 10.0 | 0.2 | 47.9 | 4.3  | 40.7  | 18.3 | 0.575 | 0.052 | 1.062 | 0.592 |
|    | F <sub>2</sub> 1 | 73.0 |     | 9.0  |     | 0.000 |       | 257.0 |       | 12.9 |     | 9.4  |     | 50.0 |      | 69.0  |      | 0.792 |       | 1.039 |       |
|    | F <sub>2</sub> 2 | 72.0 |     | 8.0  |     | 0.041 |       | 352.0 |       | 17.9 |     | 11.6 |     | 50.7 |      | 71.0  |      | 0.601 |       | 1.049 |       |
|    | F <sub>2</sub> 3 | 69.0 |     | 8.0  |     | 0.000 |       | 235.0 |       | 12.1 |     | 9.6  |     | 51.3 |      | 41.0  |      | 0.878 |       | 1.084 |       |
|    | F <sub>2</sub> 4 | 76.0 |     | 4.0  |     | 0.000 |       | 147.0 |       | 8.0  |     | 11.0 |     | 54.1 |      | 96.0  |      | 0.476 |       | 1.234 |       |
|    | F <sub>2</sub> 5 | 78.0 |     | 6.0  |     | 0.000 |       | 250.0 |       | 11.5 |     | 12.2 |     | 46.0 |      | 47.0  |      | 1.173 |       | 0.568 |       |
|    | F <sub>2</sub> 6 | 75.0 |     | 4.0  |     | 0.055 |       | 120.0 |       | 6.9  |     | 11.3 |     | 57.2 |      | 67.0  |      | 1.317 |       | 1.988 |       |
| C5 | S6C ♀            | 71.0 | 3.6 | 5.7  | 1.2 | 0.000 | 0.000 | 173.0 | 9.2   | 8.8  | 0.8 | 9.6  | 0.6 | 50.5 | 2.2  | 48.7  | 16.9 | 1.057 | 0.214 | 1.123 | 0.440 |
|    | S5C ♂            | 72.3 | 2.5 | 5.0  | 1.0 | 0.005 | 0.008 | 165.0 | 52.6  | 6.7  | 1.1 | 9.5  | 1.0 | 42.7 | 9.1  | 74.7  | 25.0 | 1.109 | 0.203 | 0.891 | 0.084 |
|    | F <sub>2</sub> 1 | 67.0 |     | 13.0 |     | 0.055 |       | 374.0 |       | 17.9 |     | 8.8  |     | 47.9 |      | 99.0  |      | 1.157 |       | 0.616 |       |
|    | F <sub>2</sub> 2 | 68.0 |     | 9.0  |     | 0.027 |       | 239.0 |       | 13.0 |     | 9.3  |     | 54.5 |      | 87.0  |      | 1.286 |       | 0.506 |       |
|    | F <sub>2</sub> 3 | 72.0 |     | 6.0  |     | 0.000 |       | 219.0 |       | 13.2 |     | 10.0 |     | 60.5 |      | 67.0  |      | 1.230 |       | 0.624 |       |
|    | F <sub>2</sub> 4 | 64.0 |     | 3.0  |     | 0.014 |       | 50.0  |       | 2.6  |     | 8.8  |     | 52.8 |      | 100.0 |      | 1.806 |       | 0.704 |       |
|    | F <sub>2</sub> 5 | 71.0 |     | 2.0  |     | 0.014 |       | 11.0  |       | 0.4  |     | 8.0  |     | 38.2 |      | 94.0  |      | 0.819 |       | 0.646 |       |
|    | F <sub>2</sub> 6 | 81.0 |     | 6.0  |     | 0.000 |       | 266.0 |       | 12.8 |     | 11.0 |     | 47.9 |      | 43.0  |      | 0.823 |       | 0.719 |       |
| C6 | P9 ♀             | 40.0 | 1.0 | 4.7  | 2.1 | 1.667 | 1.528 | 104.3 | 72.7  | 2.2  | 1.0 | 7.8  | 1.0 | 24.5 | 12.5 | 92.7  | 12.1 | 1.009 | 0.180 |       |       |
|    | S8 ♂             | 77.0 | 2.6 | 6.3  | 3.1 | 0.000 | 0.000 | 278.7 | 153.4 | 10.8 | 5.6 | 12.1 | 1.2 | 40.0 | 4.2  | 76.3  | 7.6  | 0.985 | 0.101 |       |       |
|    | F <sub>2</sub> 1 | 80.0 |     | 8.0  |     | 2.000 |       | 273.0 |       | 12.8 |     | 10.9 |     | 47.0 |      | 101.0 |      | 0.946 |       |       |       |
|    | F <sub>2</sub> 2 | 56.0 |     | 4.0  |     | 2.000 |       | 90.0  |       | 2.4  |     | 6.7  |     | 26.6 |      | 94.0  |      | 0.871 |       |       |       |
|    | F <sub>2</sub> 3 | 55.0 |     | 6.0  |     | 1.000 |       | 86.0  |       | 3.1  |     | 6.8  |     | 35.8 |      | 114.0 |      | 0.970 |       |       |       |
|    | F <sub>2</sub> 4 | 67.0 |     | 6.0  |     | 0.000 |       | 215.0 |       | 7.6  |     | 10.5 |     | 35.1 |      | 87.0  |      | 0.857 |       |       |       |
|    | F <sub>2</sub> 5 | 83.0 |     | 7.0  |     | 0.000 |       | 309.0 |       | 12.7 |     | 9.7  |     | 41.1 |      | 64.0  |      | 1.247 |       |       |       |
|    | F <sub>2</sub> 6 | 74.0 |     | 9.0  |     | 0.000 |       | 313.0 |       | 9.8  |     | 9.8  |     | 31.3 |      | 74.0  |      | 0.780 |       |       |       |
| C7 | S8 ♀             | 77.0 | 2.6 | 6.3  | 3.1 | 0.000 | 0.000 | 278.7 | 153.4 | 10.8 | 5.6 | 12.1 | 1.2 | 40.0 | 4.2  | 76.3  | 7.6  | 0.985 | 0.101 |       |       |
|    | P9 ♂             | 40.0 | 1.0 | 4.7  | 2.1 | 1.667 | 1.528 | 104.3 | 72.7  | 2.2  | 1.0 | 7.8  | 1.0 | 24.5 | 12.5 | 92.7  | 12.1 | 1.009 | 0.180 |       |       |
|    | F <sub>2</sub> 1 | 75.0 |     | 7.0  |     | 0.000 |       | 247.0 |       | 11.5 |     | 8.8  |     | 46.5 |      | 86.0  |      | 0.935 |       |       |       |
|    | F <sub>2</sub> 2 | 74.0 |     | 6.0  |     | 0.000 |       | 220.0 |       | 10.3 |     | 9.8  |     | 46.6 |      | 85.0  |      | 1.402 |       |       |       |
|    | F <sub>2</sub> 3 | 62.0 |     | 3.0  |     | 0.000 |       | 63.0  |       | 1.7  |     | 7.5  |     | 27.3 |      | 90.0  |      | 0.820 |       |       |       |
|    | F <sub>2</sub> 4 | 72.0 |     | 7.0  |     | 0.000 |       | 222.0 |       | 8.6  |     | 8.2  |     | 38.9 |      | 66.0  |      | 1.219 |       |       |       |
|    | F <sub>2</sub> 5 | 79.0 |     | 7.0  |     | 0.000 |       | 247.0 |       | 12.3 |     | 8.1  |     | 49.8 |      | 70.0  |      | 0.844 |       |       |       |
|    | F <sub>2</sub> 6 | 54.0 |     | 3.0  |     |       |       | 58.0  |       | 2.9  |     | 7.5  |     | 49.3 |      | 82.0  |      | 0.584 |       |       |       |

Highlighted in blue – specific to mother and F<sub>2</sub>; highlighted in green – specific to pater and F<sub>2</sub>; highlighted in yellow – occurring in both groups.

| C1 & C2 & C3 & C4 & C5 |                                       |  | CKO2.1 | CKO2.2. | CKX5  | CKO9  | CKX10 | CKX11 | NAC2-5A | CKX1  | CKX3  | CKX5  | CKX8  | CKX10 | CKX11 | NAC2-5A | Aktywność bezwzględna Korzeń | Aktywność bezwzględna Kłos 7DAP | Plant height | Spike number | Empty spike number | Semi-empty spike number | Grain number | Grain yield | Spike length | TGW   |
|------------------------|---------------------------------------|--|--------|---------|-------|-------|-------|-------|---------|-------|-------|-------|-------|-------|-------|---------|------------------------------|---------------------------------|--------------|--------------|--------------------|-------------------------|--------------|-------------|--------------|-------|
|                        |                                       |  | Spike  | 2 Spike | Spike | Spike | Spike | Spike | Spike   | Spike | Root  | Root  | Root  | Root  | Root  | Root    | Root                         | Root                            |              |              |                    |                         |              |             |              |       |
| CKX1 Spike M1 + P1     | M + F <sub>2</sub> p + F <sub>2</sub> |  |        |         | 0.73  |       |       |       | 0.63    |       |       |       |       |       | -0.67 |         |                              | 0.73                            |              |              |                    |                         |              | -0.61       |              |       |
|                        |                                       |  | 0.24   | 0.13    | 0.39  |       |       |       | -0.12   |       |       |       | 0.69  |       | -0.43 |         |                              | 0.58                            |              |              |                    |                         |              | -0.25       |              |       |
| CKX1 Spike M1 + P2     | M + F <sub>2</sub> p + F <sub>2</sub> |  | 0.74   | 0.75    |       |       |       |       | 0.67    |       |       | 0.14  |       | 0.75  |       | 0.35    |                              | 0.90                            | 0.67         |              |                    |                         |              |             |              |       |
|                        |                                       |  |        |         |       |       |       |       | 0.36    | 0.67  |       |       |       | 0.11  |       | 0.63    |                              | 0.80                            | 0.03         |              |                    |                         |              |             |              |       |
| CKX1 Spike M2 + P3     | M + F <sub>2</sub> p + F <sub>2</sub> |  |        |         |       |       |       |       | -0.06   | 0.68  | 0.78  |       |       |       |       |         |                              |                                 |              |              |                    |                         |              |             |              |       |
|                        |                                       |  |        |         |       |       |       |       | 0.67    | 0.68  | 0.52  |       |       |       |       |         |                              |                                 |              |              |                    |                         |              |             |              |       |
| CKX1 Spike M2 + P4     | M + F <sub>2</sub> p + F <sub>2</sub> |  |        |         |       |       |       |       | 0.16    |       |       |       |       |       | -0.20 |         |                              | 0.67                            |              |              | 0.71               |                         |              |             |              |       |
|                        |                                       |  |        |         |       |       |       |       | 0.68    |       |       |       |       |       | -0.60 |         |                              | 0.87                            |              |              | 0.55               |                         |              |             |              |       |
| CKX1 Spike M2 + P2     | M + F <sub>2</sub> p + F <sub>2</sub> |  |        | 0.51    |       |       |       |       |         |       |       |       |       |       |       |         |                              |                                 |              |              |                    |                         |              |             |              |       |
|                        |                                       |  |        | 0.62    |       |       |       |       |         |       |       |       |       |       |       |         |                              |                                 |              |              |                    |                         |              |             |              |       |
| CKO2.1 Spike M1 + P1   | M + F <sub>2</sub> p + F <sub>2</sub> |  |        | 0.05    |       |       |       |       |         |       |       |       |       |       |       |         |                              | 0.62                            |              | 0.50         |                    |                         |              |             | 0.65         |       |
|                        |                                       |  |        | 0.60    |       |       |       |       |         |       |       |       |       |       |       |         |                              | 0.33                            |              | 0.67         |                    |                         |              |             | 0.33         |       |
| CKO2.1 Spike M1 + P2   | M + F <sub>2</sub> p + F <sub>2</sub> |  |        | -0.26   |       |       |       | 0.70  |         | 0.35  |       |       |       |       |       | -0.62   |                              |                                 |              |              |                    |                         |              |             |              |       |
|                        |                                       |  |        | 0.81    |       |       |       | 0.57  |         | 0.71  |       |       |       |       |       | 0.29    |                              |                                 |              |              |                    |                         |              |             |              |       |
| CKO2.1 Spike M2 + P3   | M + F <sub>2</sub> p + F <sub>2</sub> |  |        |         |       | -0.52 |       |       |         | 0.81  |       |       |       |       | -0.67 | 0.29    |                              | -0.03                           |              |              |                    |                         |              |             |              |       |
|                        |                                       |  |        |         |       | 0.70  |       |       |         | 0.52  |       |       |       |       | -0.44 | 0.83    |                              | 0.69                            |              |              |                    |                         |              |             |              |       |
| CKO2.1 Spike M2 + P4   | M + F <sub>2</sub> p + F <sub>2</sub> |  |        |         |       |       |       |       |         |       |       |       |       |       |       |         |                              |                                 |              |              |                    |                         |              |             |              |       |
| CKO2.1 Spike M2 + P2   | M + F <sub>2</sub> p + F <sub>2</sub> |  |        | 0.10    |       | -0.65 |       |       |         | 0.74  |       |       |       |       |       |         |                              |                                 |              | 0.65         | 0.73               |                         |              |             |              |       |
|                        |                                       |  |        | 0.75    |       | -0.75 |       |       |         | 0.67  |       |       |       |       |       |         |                              |                                 |              | 0.26         | 0.41               |                         |              |             |              |       |
| CKO2.2.2 Spike M1 + P1 | M + F <sub>2</sub> p + F <sub>2</sub> |  |        |         |       |       |       |       |         |       |       |       |       |       |       |         |                              | 0.37                            |              |              | 0.65               |                         |              |             |              | -0.05 |
|                        |                                       |  |        |         |       |       |       |       |         |       |       |       |       |       |       |         |                              | 0.61                            |              |              | 0.74               |                         |              |             | 0.69         |       |
| CKO2.2.2 Spike M1 + P2 | M + F <sub>2</sub> p + F <sub>2</sub> |  |        |         | 0.72  | 0.42  | 0.62  |       |         |       |       |       |       | -0.60 |       | -0.60   |                              | -0.61                           |              |              | 0.61               |                         | 0.81         | 0.13        |              |       |
|                        |                                       |  |        |         | 0.01  | 0.68  | 0.22  |       |         |       |       |       |       | -0.29 |       | -0.50   | 0.60                         | -0.55                           |              |              | -0.02              |                         |              |             |              |       |
| CKO2.2.2 Spike M2 + P3 | M + F <sub>2</sub> p + F <sub>2</sub> |  |        |         |       |       |       |       |         |       |       |       |       |       |       |         |                              |                                 |              |              | -0.10              |                         |              |             |              |       |
|                        |                                       |  |        |         |       |       |       |       |         |       |       |       |       |       |       |         |                              |                                 |              |              | -0.62              |                         |              |             |              |       |
| CKO2.2.2 Spike M2 + P4 | M + F <sub>2</sub> p + F <sub>2</sub> |  |        |         |       |       |       |       |         |       |       | 0.60  | 0.64  |       | 0.87  |         |                              |                                 |              |              | 0.73               |                         |              |             |              |       |
|                        |                                       |  |        |         |       |       |       |       |         |       |       | 0.63  | 0.56  |       | 0.74  |         |                              |                                 |              |              | 0.14               |                         |              |             |              |       |
| CKO2.2.2 Spike M2 + P2 | M + F <sub>2</sub> p + F <sub>2</sub> |  |        |         |       |       |       |       | 0.69    |       |       |       |       |       |       |         |                              |                                 |              |              |                    |                         |              |             |              |       |
|                        |                                       |  |        |         |       |       |       |       | -0.28   |       |       |       |       |       |       |         |                              |                                 |              |              |                    |                         |              |             |              |       |
| CKX5 Spike M1 + P1     | M + F <sub>2</sub> p + F <sub>2</sub> |  |        |         | 0.50  |       |       |       | 0.68    |       | -0.61 | -0.33 | 0.29  | 0.22  |       | -0.64   | -0.37                        |                                 |              |              |                    | 0.62                    | -0.69        |             |              |       |
|                        |                                       |  |        |         | 0.76  |       |       |       | 0.80    |       | -0.78 | -0.61 | 0.66  | 0.63  |       | 0.01    | -0.61                        |                                 |              |              |                    | 0.90                    | -0.32        |             |              |       |
| CKX5 Spike M1 + P2     | M + F <sub>2</sub> p + F <sub>2</sub> |  |        |         |       | 0.43  |       |       |         |       |       |       |       |       |       |         | -0.62                        |                                 |              |              |                    | 0.78                    |              |             |              |       |
|                        |                                       |  |        |         |       | 0.67  |       |       |         |       |       |       |       |       |       |         | -0.26                        |                                 |              |              |                    | 0.31                    |              |             |              |       |
| CKX5 Spike M2 + P3     | M + F <sub>2</sub> p + F <sub>2</sub> |  |        |         | -0.68 | 0.48  |       |       |         |       |       |       |       |       |       |         |                              | -0.68                           |              |              |                    |                         |              | -0.67       |              |       |
|                        |                                       |  |        |         | 0.03  | 0.62  |       |       |         |       |       |       |       |       |       |         |                              | -0.67                           |              |              |                    |                         | 0.02         |             |              |       |
| CKX5 Spike M2 + P4     | M + F <sub>2</sub> p + F <sub>2</sub> |  |        |         |       |       |       |       |         |       |       |       | -0.02 |       |       |         |                              |                                 |              |              |                    |                         |              |             |              |       |
|                        |                                       |  |        |         |       |       |       |       |         |       |       |       | -0.60 |       |       |         |                              |                                 |              |              |                    |                         |              |             |              |       |
| CKX5 Spike M2 + P2     | M + F <sub>2</sub> p + F <sub>2</sub> |  |        |         | 0.84  | 0.78  |       |       |         |       |       |       |       |       |       |         |                              |                                 |              |              |                    |                         |              |             |              |       |
|                        |                                       |  |        |         | 0.50  | 0.87  |       |       |         |       |       |       |       |       |       |         |                              |                                 |              |              |                    |                         |              |             |              |       |
| CKX9 Spike M1 + P1     | M + F <sub>2</sub> p + F <sub>2</sub> |  |        |         |       |       |       |       | 0.38    |       | -0.08 |       |       |       |       |         |                              |                                 |              |              |                    | 0.29                    |              |             |              |       |
|                        |                                       |  |        |         |       |       |       |       | 0.72    |       | -0.66 |       |       |       |       |         |                              |                                 |              |              |                    | 0.66                    |              |             |              |       |
| CKX9 Spike M1 + P2     | M + F <sub>2</sub> p + F <sub>2</sub> |  |        |         |       |       |       |       | 0.68    |       |       |       |       |       |       |         | -0.68                        |                                 | 0.60         | 0.38         |                    |                         |              |             |              |       |
|                        |                                       |  |        |         |       |       |       |       | 0.28    |       |       |       |       |       |       |         | -0.43                        |                                 | 0.55         | 0.66         |                    | 0.65                    |              |             |              |       |
| CKX9 Spike M2 + P3     | M + F <sub>2</sub> p + F <sub>2</sub> |  |        |         |       |       |       |       |         |       |       | -0.54 | -0.35 | 0.70  | -0.49 | -0.49   |                              | -0.51                           |              |              |                    |                         |              |             |              |       |
|                        |                                       |  |        |         |       |       |       |       |         |       |       | -0.61 | -0.70 | 0.47  | -0.85 | -0.60   |                              | -0.61                           |              |              |                    |                         |              |             |              |       |
| CKX9 Spike M2 + P4     | M + F <sub>2</sub> p + F <sub>2</sub> |  |        |         |       |       | 0.60  |       |         | -0.72 |       |       |       |       |       |         |                              |                                 |              |              |                    | 0.71                    |              |             | 0.71         |       |
|                        |                                       |  |        |         |       |       | 0.49  |       |         | -0.21 |       |       |       |       |       |         |                              |                                 |              |              |                    | 0.50                    |              |             | 0.42         |       |
| CKX9 Spike M2 + P2     | M + F <sub>2</sub> p + F <sub>2</sub> |  |        |         |       |       |       |       |         |       |       |       |       |       |       |         |                              |                                 |              |              |                    |                         |              |             |              |       |
| CKX10 Spike M1 + P1    | M + F <sub>2</sub> p + F <sub>2</sub> |  |        |         |       |       |       |       | 0.75    | 0.83  |       |       |       | 0.61  |       | -0.18   |                              |                                 |              |              |                    |                         |              |             |              | 0.73  |
|                        |                                       |  |        |         |       |       |       |       | 0.75    | 0.59  |       |       |       | 0.69  |       | -0.69   |                              |                                 |              |              |                    |                         |              |             |              | 0.13  |
| CKX10 Spike M1 + P2    | M + F <sub>2</sub> p + F <sub>2</sub> |  |        |         |       |       |       |       |         |       |       |       | -0.33 | -0.93 | -0.29 | -0.93   | -0.69                        |                                 |              |              |                    | 0.64                    |              |             |              |       |
|                        |                                       |  |        |         |       |       |       |       |         |       |       |       | -0.62 | -0.74 | -0.62 | -0.90   | -0.36                        |                                 |              |              |                    | 0.31                    |              |             |              |       |
| CKX10 Spike M2 + P3    | M + F <sub>2</sub> p + F <sub>2</sub> |  |        |         |       |       |       |       | 0.75    |       | -0.69 |       | 0.91  |       | 0.88  |         | -0.76                        |                                 |              |              |                    |                         |              |             | -0.78        |       |
|                        |                                       |  |        |         |       |       | 0.57  |       |         |       | -0.69 |       | -0.13 |       | 0.15  |         | 0.04                         |                                 |              |              |                    |                         |              |             | -0.28        |       |
| CKX10 Spike M2 + P4    | M + F <sub>2</sub> p + F <sub>2</sub> |  |        |         |       |       |       |       |         |       |       |       |       |       |       |         |                              |                                 |              |              |                    |                         |              |             |              |       |
| CKX10 Spike M2 + P2    | M + F <sub>2</sub> p + F <sub>2</sub> |  |        |         |       |       |       |       |         |       |       |       |       |       |       | -0.60   | -0.63                        |                                 |              |              |                    |                         |              |             |              |       |
|                        |                                       |  |        |         |       |       |       |       |         |       |       |       |       |       |       | -0.02   | -0.27                        |                                 |              |              |                    |                         |              |             |              |       |
| CKX11 Spike M1 + P1    | M + F <sub>2</sub> p + F <sub>2</sub> |  |        |         |       |       |       | 0.79  | -0.26   |       |       |       | 0.88  |       | -0.71 |         |                              |                                 |              |              | -0.71              |                         | 0.02         | -0.65       |              |       |
|                        |                                       |  |        |         |       |       |       | 0.28  | -0.69   |       |       |       | 0.86  |       | 0.07  |         |                              |                                 |              |              | -0.02              |                         | 0.76         | -0.15       |              |       |
| CKX11 Spike M1 + P2    | M + F <sub>2</sub> p + F <sub>2</sub> |  |        |         |       |       |       |       |         |       |       |       |       |       |       |         |                              | 0.66                            | 0.79         |              |                    |                         |              |             |              |       |
|                        |                                       |  |        |         |       |       |       |       |         |       |       |       |       |       |       |         |                              | 0.24                            | -0.08        |              |                    |                         |              |             |              |       |
| CKX11 Spike M2 + P3    | M + F <sub>2</sub> p + F <sub>2</sub> |  |        |         |       |       |       |       |         |       | -0.67 |       | 0.62  | 0.61  | 0.70  |         |                              |                                 |              |              | 0.67               |                         |              |             | -0.63        |       |
|                        |                                       |  |        |         |       |       |       |       |         |       | -0.64 |       | -0.37 | -0.41 | -0.14 |         |                              |                                 |              |              | -0.13              |                         |              |             | 0.01         |       |
| CKX11 Spike M2 + P4    | M + F <sub>2</sub> p + F <sub>2</sub> |  |        |         |       |       |       |       |         |       | -0.83 | -0.69 | 0.73  | 0.62  |       | -0.29   |                              | 0.04                            | 0.83         |              |                    |                         |              |             | 0.64         |       |
|                        |                                       |  |        |         |       |       |       |       |         |       | -0.51 | -0.33 | 0.62  | 0.35  |       | 0.67    |                              | 0.60                            | 0.25         |              |                    |                         |              |             | 0.49         |       |
| CKX11 Spike M2 + P2    | M + F <sub>2</sub> p + F <sub>2</sub> |  |        |         |       |       |       |       |         |       | -0.62 |       |       |       | 0.51  |         | -0.74                        |                                 |              |              |                    |                         |              |             |              |       |
|                        |                                       |  |        |         |       |       |       |       |         |       | -0.02 |       |       |       | 0.75  |         | 0.22                         |                                 |              |              |                    |                         |              |             |              |       |
| NAC2-5A Spike M1 + P1  | M + F <sub>2</sub> p + F <sub>2</sub> |  |        |         |       |       |       |       |         |       | -0.32 |       | 0.66  |       |       | -0.65   |                              |                                 |              |              |                    |                         | -0.66        | -0.71       | 0.70         |       |
|                        |                                       |  |        |         |       |       |       |       |         |       | -0.78 |       | 0.61  |       | -0.88 |         |                              |                                 |              |              |                    |                         | -0.39        | -0.55       | 0.50         |       |
| NAC2-5A Spike M1 + P2  | M + F <sub>2</sub> p + F <sub>2</sub> |  |        |         |       |       |       |       |         |       |       |       |       |       |       |         | 0.78                         |                                 |              |              | 0.73               |                         | -0.64        | -0.77       |              |       |
|                        |                                       |  |        |         |       |       |       |       |         |       |       |       |       |       |       |         | 0.36                         |                                 |              |              | 0.21               |                         | -0.46        | -0.35       |              |       |
| NAC2-5A Spike M2 + P3  | M + F <sub>2</sub> p + F <sub>2</sub> |  |        |         |       |       |       |       |         |       | -0.48 |       |       |       |       |         |                              |                                 |              |              | -0.31              |                         | -0.49        | -0.62       |              |       |
|                        |                                       |  |        |         |       |       |       |       |         |       | -0.90 |       |       |       |       |         |                              |                                 |              |              | -0.75              |                         | -0.84        | -0.62       |              |       |
| NAC2-5A Spike M2 + P4  | M + F <sub>2</sub> p + F <sub>2</sub> |  |        |         |       |       |       |       |         |       |       |       |       |       |       | -0.68   |                              |                                 |              |              |                    |                         |              |             |              |       |
|                        |                                       |  |        |         |       |       |       |       |         |       |       |       |       |       |       | -0.63   |                              |                                 |              |              |                    |                         |              |             |              |       |
| NAC2-5A Spike M2 + P2  | M + F <sub>2</sub> p + F <sub>2</sub> |  |        |         |       |       |       |       |         |       |       |       |       | -0.35 |       | -0.71   |                              |                                 |              |              |                    |                         |              |             |              |       |
|                        |                                       |  |        |         |       |       |       |       |         |       |       |       | -0.66 |       |       | 0.46    |                              |                                 |              |              |                    |                         |              |             |              |       |

**Table S3.** Correlation coefficients between the expression of *TaCKX* GFM and *NAC2* in spikes or spikes per roots, as well as yield-related traits in the groups of M + F<sub>2</sub> and P + F<sub>2</sub> of reciprocal crosses of awned x awnless (C6) and awnless x awned parents (C7).

| 7K (C6 awned x awnless) |                          | CKX2.1 Spike | CKX2.2.2 Spike | CKX5 Spike | CKX9 Spike | CKX10 Spike | CKX11 Spike | NAC2-5A Spike | CKX1 Root | CKX3 Root | CKX5 Root | CKX8 Root | CKX10 Root | CKX11 Root | NAC2-5A Root | Plant height | Spike number | Empty spike number | Semi-empty spike        | Grain number | Grain yield | Spike length | TGW   | Root weight |       |
|-------------------------|--------------------------|--------------|----------------|------------|------------|-------------|-------------|---------------|-----------|-----------|-----------|-----------|------------|------------|--------------|--------------|--------------|--------------------|-------------------------|--------------|-------------|--------------|-------|-------------|-------|
| CKX1 Spike              | C6 (M + F <sub>2</sub> ) | 0.78         | 0.82           | 0.71       | 0.67       | 0.69        | 0.86        | 0.67          |           |           | 0.79      | -0.71     | -0.82      |            | 0.74         |              |              |                    |                         | -0.52        | -0.42       | 0.11         |       | -0.70       |       |
|                         | C6 (P + F <sub>2</sub> ) | 0.72         | 0.83           | 0.71       | 0.69       | 0.76        | 0.86        | 0.69          |           |           | 0.00      | -0.18     | -0.79      |            | 0.02         |              |              |                    |                         | 0.60         | 0.60        | 0.65         |       | -0.60       |       |
| CKX2.1 Spike            | C6 (M + F <sub>2</sub> ) |              | 0.88           | 0.81       | 0.72       | 0.81        |             | 0.81          | -0.67     |           |           |           |            |            |              |              |              |                    | -0.27                   |              |             |              | -0.62 | -0.90       |       |
|                         | C6 (P + F <sub>2</sub> ) |              | 0.80           | 0.76       | 0.77       | 0.90        |             | 0.81          | -0.13     |           |           |           |            |            |              |              |              |                    | -0.79                   |              |             |              | 0.24  | -0.66       |       |
| CKX2.2.2 Spike          | C6 (M + F <sub>2</sub> ) |              |                | 0.64       | 0.76       | 0.83        | 0.62        | 0.71          |           |           | 0.61      | -0.68     |            |            |              |              |              |                    | -0.39                   |              |             |              |       | -0.97       |       |
|                         | C6 (P + F <sub>2</sub> ) |              |                | 0.75       | 0.74       | 0.83        | 0.62        | 0.69          |           |           | -0.25     | -0.11     |            |            |              |              |              |                    | -0.78                   |              |             |              |       | -0.88       |       |
| CKX5 Spike              | C6 (M + F <sub>2</sub> ) |              |                |            | 0.84       | 0.75        | 0.99        | 0.79          | -0.93     |           | 0.98      | -0.87     | -0.84      | -0.82      | 0.90         | -0.83        | -0.80        |                    |                         | -0.70        | -0.68       |              | -0.84 | -0.69       |       |
|                         | C6 (P + F <sub>2</sub> ) |              |                |            | 0.86       | 0.82        | 0.64        | 0.96          | 0.11      | -0.61     | 0.21      | -0.43     | -0.36      | -0.57      | -0.57        | 0.07         | -0.35        |                    |                         | 0.12         | 0.00        |              | 0.17  | -0.31       |       |
| CKX9 Spike              | C6 (M + F <sub>2</sub> ) |              |                |            |            | 0.99        | 0.90        | 0.92          | -0.76     |           | 0.92      | -0.84     | -0.70      |            | 0.73         | -0.88        | -0.82        |                    |                         | -0.72        | -0.70       | -0.41        | -0.89 | -0.73       |       |
|                         | C6 (P + F <sub>2</sub> ) |              |                |            |            | 0.60        | 0.95        | 0.92          | 0.39      |           | -0.08     | -0.27     | -0.59      |            | -0.31        | 0.37         | -0.01        |                    |                         | 0.33         | 0.33        | 0.72         | 0.26  | -0.36       |       |
| CKX10 Spike             | C6 (M + F <sub>2</sub> ) |              |                |            |            |             | 0.84        | 0.86          | -0.71     |           | 0.84      | -0.82     | -0.61      |            | 0.62         | -0.82        | -0.79        |                    | -0.46                   | -0.67        | -0.64       |              | -0.86 | -0.72       |       |
|                         | C6 (P + F <sub>2</sub> ) |              |                |            |            |             | 0.42        | 0.84          | 0.28      |           | -0.14     | -0.15     | -0.54      |            | -0.25        | 0.35         | 0.54         |                    | -0.87                   | 0.64         | 0.58        |              | 0.06  | -0.24       |       |
| CKX11 Spike             | C6 (M + F <sub>2</sub> ) |              |                |            |            |             |             | 0.86          | -0.79     |           | 0.97      | -0.93     | -0.76      |            | 0.88         | -0.86        | -0.86        |                    |                         | -0.73        | -0.69       | 0.06         | -0.89 | -0.77       |       |
|                         | C6 (P + F <sub>2</sub> ) |              |                |            |            |             |             | 0.77          | 0.15      |           | -0.19     | -0.12     | -0.49      |            | -0.24        | 0.35         | 0.15         |                    |                         | 0.42         | 0.34        | 0.73         | 0.09  | -0.35       |       |
| NAC2-5A Spike           | C6 (M + F <sub>2</sub> ) |              |                |            |            |             |             |               | -0.80     |           | 0.96      | -0.92     | -0.75      |            | 0.90         | -0.88        | -0.86        |                    | -0.31                   | -0.72        | -0.69       | -0.25        | -0.88 | -0.80       |       |
|                         | C6 (P + F <sub>2</sub> ) |              |                |            |            |             |             |               | 0.50      |           | -0.07     | -0.15     | -0.58      |            | -0.25        | 0.43         | 0.24         |                    | -0.70                   | 0.50         | 0.44        | 0.67         | 0.20  | -0.45       |       |
| 8K (C7 awnless x awned) |                          | CKX2.1 Spike | CKX2.2.2 Spike | CKX5 Spike | CKX9 Spike | CKX10 Spike | CKX11 Spike | NAC2-5A Spike | CKX1 Root | CKX3 Root | CKX5 Root | CKX8 Root | CKX10 Root | CKX11 Root | NAC2-5A Root | Plant height | Spike number | Empty spike number | Semi-empty spike number | Grain number | Grain yield | Spike length | TGW   | Root weight |       |
| CKX1 Spike              | C7 (M + F <sub>2</sub> ) | 0.79         |                | 0.75       | 0.87       | 0.71        | 0.77        | 0.93          | 0.27      | 0.12      |           | 0.67      |            |            |              | 0.41         |              |                    |                         | 0.17         | 0.43        |              | 0.92  | -0.45       | -0.19 |
|                         | C7 (P + F <sub>2</sub> ) | 0.81         |                | 0.75       | 0.85       | 0.64        | 0.77        | 0.92          | -0.73     | -0.67     |           | -0.45     |            |            |              | -0.67        |              |                    | 0.79                    | -0.60        |             | -0.14        | -0.78 | -0.64       |       |
| CKX2.1 Spike            | C7 (M + F <sub>2</sub> ) |              | 0.81           | 0.95       | 0.99       | 0.68        | 0.90        | 0.97          | 0.83      | 0.71      | 0.93      | 0.79      | -0.02      | -0.55      | 0.22         | 0.50         | 0.20         |                    |                         | 0.17         | 0.27        | 0.35         | 0.85  | -0.17       |       |
|                         | C7 (P + F <sub>2</sub> ) |              | 0.83           | 0.91       | 0.90       | 0.80        | 0.94        | 0.97          | -0.43     | -0.30     | 0.98      | -0.87     | -0.77      | -0.80      | 0.98         | -0.92        | -0.67        |                    | 0.79                    | -0.78        | -0.73       | -0.49        | -0.89 |             |       |
| CKX2.2.2 Spike          | C7 (M + F <sub>2</sub> ) |              |                | 0.86       |            | 0.69        | 0.60        |               | 0.38      |           |           | 0.31      |            | -0.86      |              | 0.30         | 0.11         |                    |                         | 0.17         | 0.16        | 0.02         | -0.28 | -0.45       |       |
|                         | C7 (P + F <sub>2</sub> ) |              |                | 0.75       |            | 0.69        | 0.60        |               | -0.62     |           |           | -0.81     |            | -0.88      |              | -0.85        | -0.62        |                    | 0.79                    | -0.70        | -0.72       | -0.62        | -0.78 |             |       |
| CKX5 Spike              | C7 (M + F <sub>2</sub> ) |              |                |            | 0.92       | 0.53        | 0.77        | 0.90          | 0.95      | 0.92      | 0.99      | 0.79      | -0.26      | -0.45      | 0.56         | 0.66         | 0.17         |                    | bd                      | 0.32         | 0.40        | 0.79         | 0.04  | -0.38       |       |
|                         | C7 (P + F <sub>2</sub> ) |              |                |            | 0.83       | 0.75        | 0.99        | 0.79          | -0.63     | -0.48     | 1.00      | -0.90     | -0.81      | -0.82      | 0.98         | -0.86        | -0.80        |                    | 0.87                    | -0.89        | -0.66       | -0.51        | -0.85 | -0.79       |       |
| CKX9 Spike              | C7 (M + F <sub>2</sub> ) |              |                |            |            | 0.60        | 0.95        | 0.93          | 0.75      | 0.82      | 0.88      | 0.80      | 0.01       | -0.55      | 0.13         | 0.45         | 0.09         |                    | bd                      | 0.33         | 0.35        | 0.93         | -0.25 | -0.14       |       |
|                         | C7 (P + F <sub>2</sub> ) |              |                |            |            | 0.99        | 0.91        | 0.93          | -0.62     | -0.24     | 0.94      | -0.85     | -0.60      | -0.71      | 0.81         | -0.91        | -0.85        |                    | 0.82                    | -0.78        | -0.70       | -0.59        | -0.90 | -0.82       |       |
| CKX10 Spike             | C7 (M + F <sub>2</sub> ) |              |                |            |            |             | 0.42        | 0.84          | 0.66      | 0.80      | 0.82      | 0.78      |            | -0.51      | 0.38         | 0.47         | 0.40         |                    | bd                      | 0.52         | 0.65        | 0.60         | -0.14 | -0.11       |       |
|                         | C7 (P + F <sub>2</sub> ) |              |                |            |            |             | 0.84        | 0.86          | -0.57     | -0.03     | 0.87      | -0.79     |            | -0.62      | 0.69         | -0.86        | -0.74        |                    | 0.85                    | -0.71        | -0.65       | -0.60        | -0.85 | -0.79       |       |
| CKX11 Spike             | C7 (M + F <sub>2</sub> ) |              |                |            |            |             |             | 0.78          | 0.55      | 0.70      | 0.73      | 0.77      | 0.10       | -0.52      | 0.09         | 0.37         | 0.18         |                    | bd                      | 0.31         | 0.34        | 0.91         | -0.29 | -0.03       |       |
|                         | C7 (P + F <sub>2</sub> ) |              |                |            |            |             |             | 0.87          | -0.63     | -0.47     | 1.00      | -0.89     | -0.73      | -0.79      | 0.95         | -0.90        | -0.78        |                    | 0.82                    | -0.83        | -0.71       | -0.57        | -0.90 | -0.81       |       |
| NAC2-5A Spike           | C7 (M + F <sub>2</sub> ) |              |                |            |            |             |             |               | 0.87      | 0.87      | 0.95      | 0.79      | -0.06      | -0.54      | 0.15         | 0.48         | 0.18         |                    | bd                      | 0.38         | 0.44        | 0.86         | -0.21 | -0.17       |       |
|                         | C7 (P + F <sub>2</sub> ) |              |                |            |            |             |             |               | -0.62     | -0.51     | 1.00      | -0.89     | -0.74      | -0.79      | 0.96         | -0.92        | -0.75        |                    | 0.82                    | -0.68        | -0.70       | -0.47        | -0.88 | -0.84       |       |

Highlighted in blue – specific to mother and F<sub>2</sub>; highlighted in green – specific to pater and F<sub>2</sub>; highlighted in yellow – occurring in both groups. Bold – significant at  $p \geq 0.01$ .
